# Supplementary material for: Mechanochemical borylation of aryldiazonium salts; merging light and ball milling
Source: publisher site journal article supplement (doi:10.3762/bjoc.13.144), 2017-07-26
Supplement: Additional file 1 [file 1860-5397-13-144-S1.pdf]

**Supporting Information**  
**for**  
**Mechanochemical borylation of aryldiazonium salts; merging light and**  
**ball milling**

José G. Hernández\*

Address: Institute of Organic Chemistry, RWTH Aachen University, Landoltweg 1, D-  
52074 Aachen, Germany

Email: José G. Hernández - [jose.hernandez@oc.rwth-aachen.de](mailto:jose.hernandez@oc.rwth-aachen.de)

\*Corresponding author

**Experimental procedures, experimental set-ups and characterization**  
**data, NMR spectra, and DSC traces**

**CONTENTS**

|                                                                                |     |
|--------------------------------------------------------------------------------|-----|
| <b>1. General information</b>                                                  | S2  |
| <b>2. Milling media and equipment</b>                                          | S3  |
| <b>3. General procedures for the mechanochemical reactions</b>                 | S4  |
| <b>4. Table S1. Screening of the reaction conditions; neat grinding</b>        | S5  |
| <b>5. Table S2. Screening of the reaction conditions; LAG experiments</b>      | S6  |
| <b>6. Characterization of products 3a–e</b>                                    | S6  |
| <b>7. NMR spectra of 3a–e</b>                                                  | S8  |
| <b>8. Differential Scanning Calorimetry (DSC) of 1a-e</b>                      | S16 |
| <b>9. Thermal decomposition of iodophenyl diazonium tetrafluoroborate (1d)</b> | S19 |
| <b>10. Borylation of 1a in the presence of 1,1-diphenylethene (4)</b>          | S19 |
| <b>11. References</b>                                                          | S21 |

## 1. General information

NMR spectra were recorded on a VNMRs 400 or a VNMRs 600 spectrometer. Proton chemical shifts are reported in parts per million on the  $\delta$  scale and are calibrated using the residual non-deuterated solvent signal as an internal reference (MeCN- $d_3$ :  $\delta = 1.94$  ppm). Spectral data is provided as follows: chemical shift in ppm (from downfield to upfield), multiplicity (s = singlet, d = doublet, m = multiplet), integration and coupling constant  $J$ . GC-MS analysis was performed on an Agilent 7890A GC with an Agilent 5975C inert XL EI/CI MSD with triple axis detector and an Agilent DB-5ms column (30 m  $\times$  0.25 mm  $\times$  0.25  $\mu$ m) using helium as the carrier gas. detector. Differential scanning calorimetry (DSC) analysis was conducted on a Mettler Toledo DSC System. All samples were heated at a rate of 5  $^{\circ}$ C/min from 25 to 200  $^{\circ}$ C. Thermograms were analyzed using Mettler Toledo software.

Mechanochemical reactions were carried out in a RETSCH MM400 Mixer mill using milling jars made of Plexiglas<sup>®</sup> [(Poly(methyl methacrylate) (PMMA)], or Teflon<sup>®</sup> with ZrO<sub>2</sub> milling balls of 5 or 1.5 mm in diameter. Blue and green irradiation was provided by LEDs strips of 70 cm and 90 cm in length respectively, coiled around the milling jar. Substrates **1c**, **1b**, **1d** were prepared according to reported methods.<sup>[1]</sup> Aryldiazonium salts **1a** and **1e** were purchased from commercial suppliers.

## 2. Milling media and equipment

### Design and dimensions

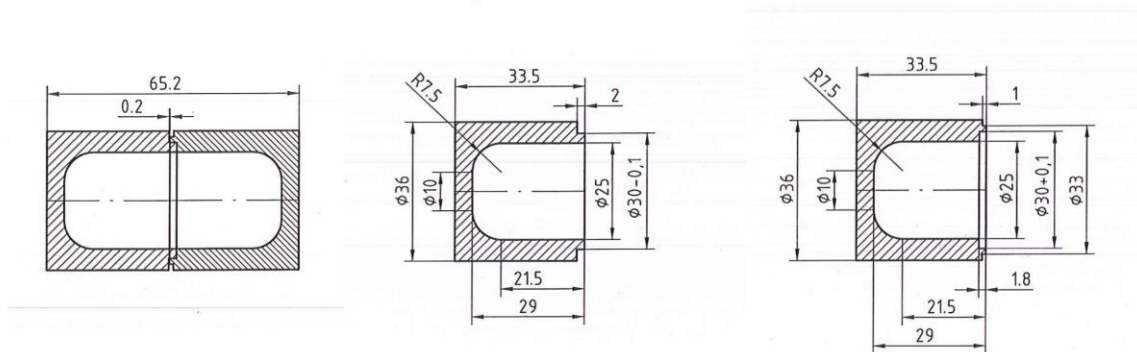

### 25 mL PMMA milling jars

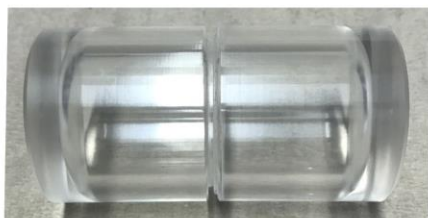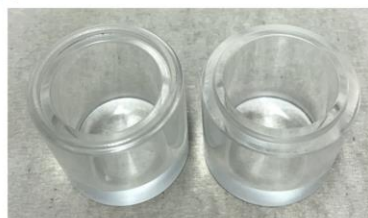

### 25 mL Teflon milling jars

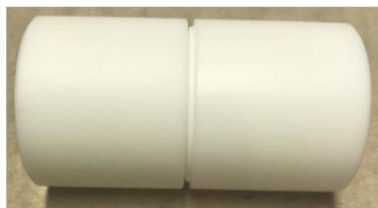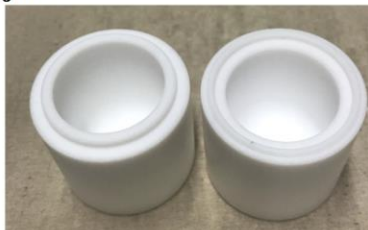

### Setup for photo- mechanochemical reactions with external irradiation

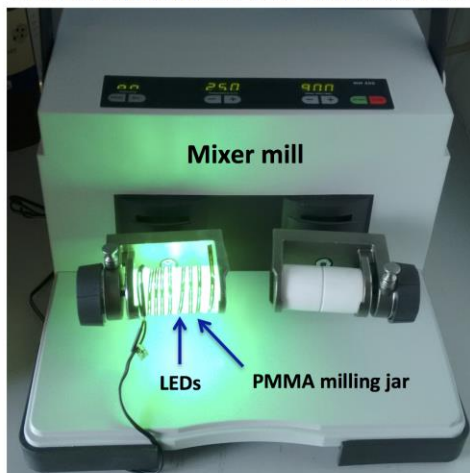

### 3. General procedures for the mechanochemical reactions

#### 3.1 Neat grinding experiments:

A mixture of **1** (0.369 mmol), **2** (0.369 or 0.554 mmol) and eosin Y (11.96 mg; 5 mol %) was mixed in a 25 mL PMMA milling jar with 15 ZrO<sub>2</sub> balls of 5 mm in diameter at 25 Hz. Irradiation of the reaction mixture was achieved by wrapping the milling jar with a green-LED strip (90 cm; see picture in section 2). After the milling was stopped, the reaction mixture was recovered from the milling jar and the product was purified by column chromatography (SiO<sub>2</sub>, eluent 100:1 *n*-pentane/ethyl acetate).

#### 3.2 LAG experiments:

A mixture of **1a** (50 mg; 0.185 mmol) and **2** (70 mg; 0.277 mmol) was mixed in the presence of the solvent (30 μL,  $\eta = 0.25$ ), in a 25 mL PMMA milling jar (higher values of LAG can cause chemical damage to the plastic milling jar). Irradiation of the reaction mixture was achieved by wrapping the PMMA milling jar with a blue-LED strip (70 cm). After the milling was stopped, the reaction mixture was recovered from the milling jar and the product was purified by column chromatography (SiO<sub>2</sub>, eluent 100:1 *n*-pentane/ethyl acetate).

#### 4. Table S1. Screening of the reaction conditions; neat grinding.<sup>[a]</sup>

Reaction scheme: **1a** + **2**  $\xrightarrow[\text{Ball milling, light}]{\text{Eosin Y}}$  **3a**

| Entry             | Eosin Y (mol%) | Time (h) | Light             | <b>1a:3a</b> (%) <sup>[f]</sup> |
|-------------------|----------------|----------|-------------------|---------------------------------|
| 1 <sup>[b]</sup>  | ---            | 2        | ---               | 100:0                           |
| 2 <sup>[b]</sup>  | 5              | 2        | ---               | 100:0                           |
| 3                 | 5              | 2        | ambient           | 100:0                           |
| 4                 | ---            | 2        | blue LEDs         | 100:0                           |
| 5 <sup>[c]</sup>  | 5              | 2        | blue LEDs         | 93:7                            |
| 6                 | 5              | 0.5      | blue LEDs         | 83:17                           |
| 7                 | 5              | 1        | blue LEDs         | 54:46                           |
| 8                 | 5              | 1.5      | blue LEDs         | 27:73                           |
| 9                 | 5              | 2        | blue LEDs         | 15:85                           |
| 10 <sup>[d]</sup> | 5              | 2        | blue LEDs         | 59:41                           |
| 11 <sup>[e]</sup> | 5              | 2        | blue LEDs         | 51:49                           |
| <b>12</b>         | <b>5</b>       | <b>1</b> | <b>green LEDs</b> | <b>6:94</b>                     |
| 13                | 5              | 0.5      | green LEDs        | 30:70                           |
| 14                | 3              | 1        | green LEDs        | 20:80                           |
| 15                | 1              | 1        | green LEDs        | 24:76                           |
| 16                | 0.5            | 1.5      | green LEDs        | 63:37                           |

[a] Reaction conditions: a mixture of **1a** (0.369 mmol), **2** (0.369 mmol) and eosin Y was mixed in a 25 mL PMMA milling jar with 15 ZrO<sub>2</sub> balls of 5 mm in diameter at 25 Hz. [b] A 25 mL Teflon milling jar was used. [c] **1a**, **2** and the PC were mixed for 30 s in the PMMA jar, then the mixing was stopped and the milling jar was exposed to the light irradiation for 2h. [d] The irradiation was stopped after 1 h of reaction, [e] The milling was stopped after 1 h of reaction, [f] determined by <sup>1</sup>H NMR spectroscopy.

## 5. Table S2. Screening of the reaction conditions; LAG experiments.<sup>[a]</sup>

| Entry | Light     | LAG; solvent ( $\eta$ )             | Time (h) | 1a:3a (%) <sup>[b]</sup>    |
|-------|-----------|-------------------------------------|----------|-----------------------------|
| 1     | ---       | ---                                 | 2        | 100:0                       |
| 2     | Blue LEDs | ---                                 | 2        | 100:0                       |
| 3     | Blue LEDs | <i>n</i> -heptane<br>(0.25 or 0.35) | 2        | 99:1                        |
| 4     | Blue LEDs | MeCN (0.35)                         | 2        | 46:54                       |
| 5     | Blue LEDs | DMSO (0.25)                         | 1.5      | 2:98<br>(65) <sup>[c]</sup> |
| 6     | ---       | DMSO (0.25)                         | 2        | 94:6                        |

[a] Reaction conditions: a mixture of **1a** (50 mg; 0.184 mmol), **2** (70 mg; 0.277 mmol) and the LAG solvent was mixed at 25 Hz. [b] Determined by <sup>1</sup>H NMR spectroscopy. [c] After column chromatography.

## 6. Characterization of products 3a–e

### 2-(4-Fluorophenyl)-4,4,5,5-tetramethyl-1,3,2-dioxaborolane (**3b**)<sup>[2]</sup>

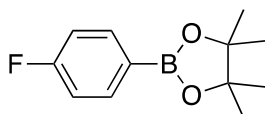

<sup>1</sup>H NMR (400 MHz, CD<sub>3</sub>CN):  $\delta$  (ppm) 7.81-7.68 (m, 2H), 7.19-7.08 (m, 2H) 1.32 (s, 12H).

<sup>13</sup>C NMR (100 MHz, CD<sub>3</sub>CN):  $\delta$  (ppm) 165.9 (d,  $J = 248.8$  Hz), 137.8 (d,  $J = 8.8$  Hz), 115.8 (d,  $J = 20.6$  Hz), 85.0, 25.2. The carbon directly attached to the boron atom was not detected, likely due to quadrupolar broadening.

<sup>11</sup>B NMR (192 MHz, CD<sub>3</sub>CN):  $\delta$  (ppm) 29.3; <sup>19</sup>F NMR (376 MHz, CD<sub>3</sub>CN):  $\delta$  (ppm) -110.2.

MS (EI)  $m/z = 222.1$  [ $M^+$ ], 207.1, 136.1, 123.0, 85.1.

**2-(4-Chlorophenyl)-4,4,5,5-tetramethyl-1,3,2-dioxaborolane (3c)**<sup>[3]</sup>

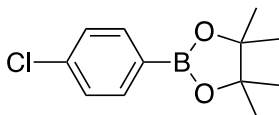

**<sup>1</sup>H NMR (400 MHz, CD<sub>3</sub>CN):** δ (ppm) 7.69-7.61 (m, 2H), 7.41-7.39 (m, 2H) 1.32 (s, 12H).

**<sup>13</sup>C NMR (100 MHz, CD<sub>3</sub>CN):** δ (ppm) 137.0, 129.0, 118.3, 85.1, 25.2. The carbon directly attached to the boron atom was not detected, likely due to quadrupolar broadening.

**<sup>11</sup>B NMR (192 MHz, CD<sub>3</sub>CN):** δ (ppm) 30.6.

**MS (EI) *m/z* =** 238.1 [M<sup>+</sup>], 223.1, 152.0, 139.0, 103.0.

**2-(4-Bromophenyl)-4,4,5,5-tetramethyl-1,3,2-dioxaborolane (3a)**<sup>[3]</sup>

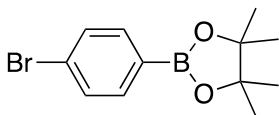

**<sup>1</sup>H NMR (400 MHz, CD<sub>3</sub>CN):** δ (ppm) 7.62-7.60 (m, 2H), 7.55-7.54 (m, 2H) 1.31 (s, 12H).

**<sup>13</sup>C NMR (100 MHz, CD<sub>3</sub>CN):** δ (ppm) 137.1, 132.0, 126.6, 85.1, 25.1. The carbon directly attached to the boron atom was not detected, likely due to quadrupolar broadening.

**<sup>11</sup>B NMR (192 MHz, CD<sub>3</sub>CN):** δ (ppm) 30.6.

**MS (EI) *m/z* =** 284.0 [M<sup>+</sup>], 282.0 [M<sup>+</sup>], 267.0, 196.0, 183.0, 103.0.

**2-(4-Iodophenyl)-4,4,5,5-tetramethyl-1,3,2-dioxaborolane (3d)**<sup>[4]</sup>

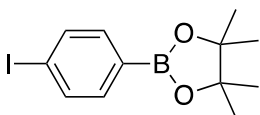

**<sup>1</sup>H NMR (600 MHz, CD<sub>3</sub>CN):** δ (ppm) 7.80-7.75 (m, 2H), 7.49-7.43 (m, 2H) 1.31 (s, 12H).

**<sup>13</sup>C NMR (150 MHz, CD<sub>3</sub>CN):** δ (ppm) 138.1, 137.0, 99.1, 85.1, 25.2. The carbon directly attached to the boron atom was not detected, likely due to quadrupolar broadening.

**<sup>11</sup>B NMR (192 MHz, CD<sub>3</sub>CN):** δ (ppm) 30.7.

**MS (EI) *m/z* =** 331.1 [M<sup>+</sup>], 330.0 [M<sup>+</sup>], 329.1 [M<sup>+</sup>], 315.0, 244.0, 229.0, 127.0, 104.1.

## 2-(4-Nitrophenyl)-4,4,5,5-tetramethyl-1,3,2-dioxaborolane (3e)<sup>[3]</sup>

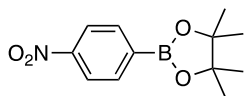

<sup>1</sup>H NMR (400 MHz, CD<sub>3</sub>CN): δ (ppm) 8.22-8.16 (m, 2H), 7.95-7.88 (m, 2H) 1.35 (s, 12H).

<sup>13</sup>C NMR (100 MHz, CD<sub>3</sub>CN): δ (ppm) 150.9, 136.3, 123.5, 85.6, 25.1. The carbon directly attached to the boron atom was not detected, likely due to quadrupolar broadening.

<sup>11</sup>B NMR (128 MHz, CD<sub>3</sub>CN): δ (ppm) 30.1.

MS (EI) *m/z* = 249.1 [M<sup>+</sup>], 234.1, 163.1.

### 7. NMR spectra of 3a-e

#### <sup>1</sup>H NMR of 2-(4-Fluorophenyl)-4,4,5,5-tetramethyl-1,3,2-dioxaborolane (3b)

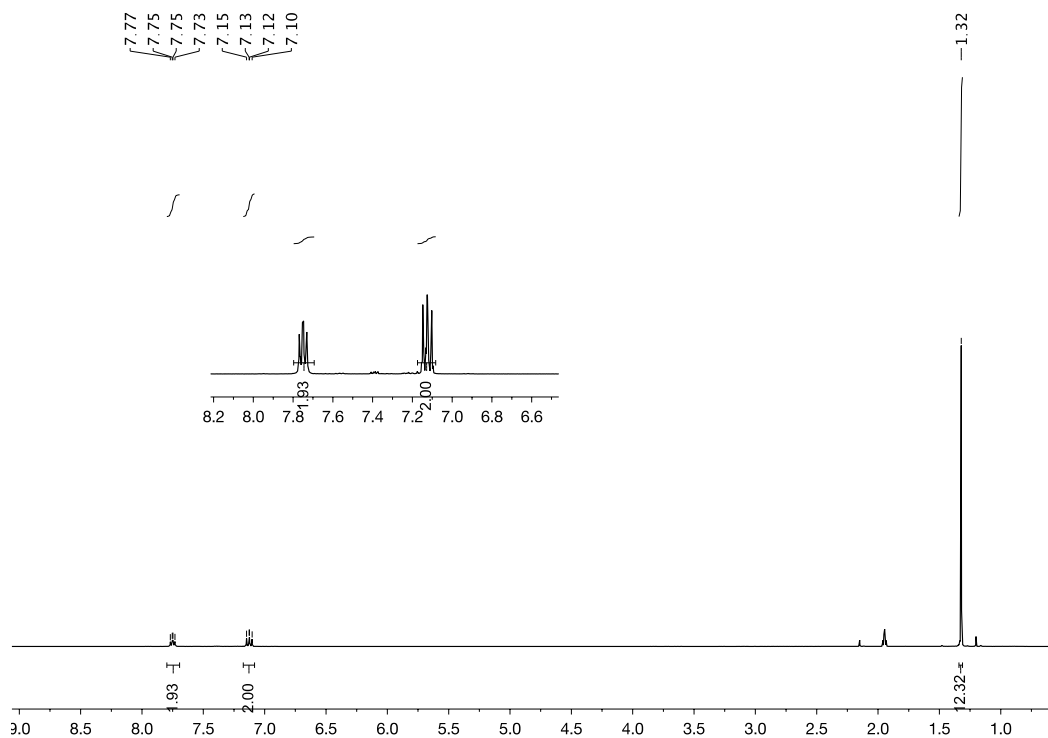



**<sup>13</sup>C NMR of 2-(4-Fluorophenyl)-4,4,5,5-tetramethyl-1,3,2-dioxaborolane (3b)**

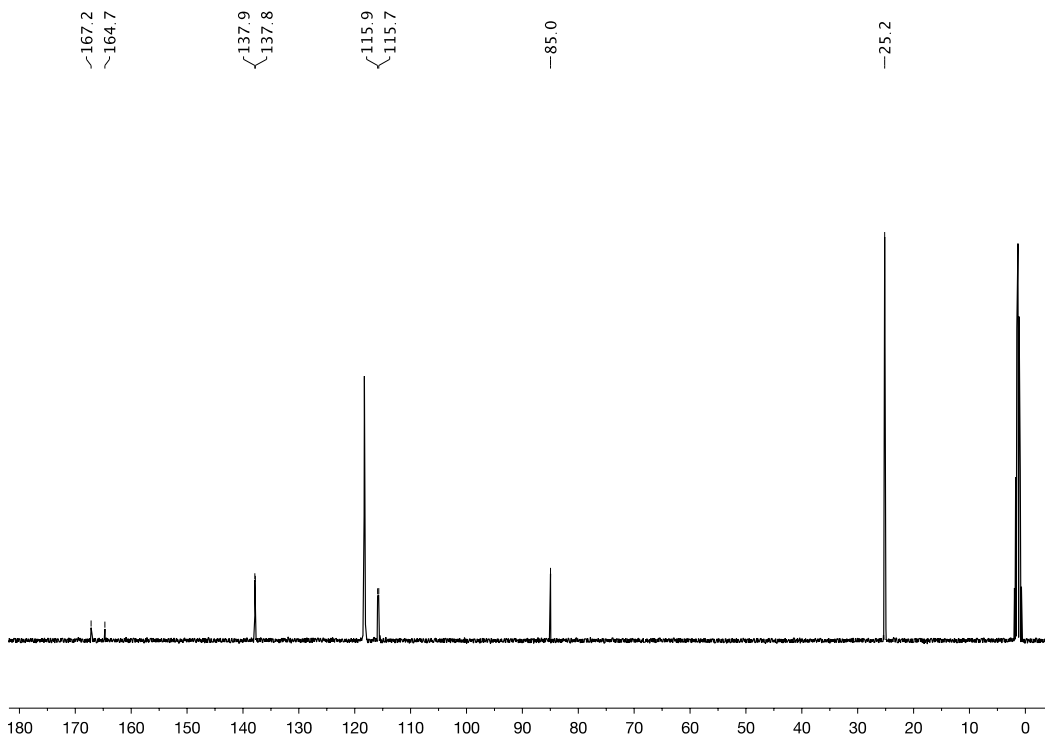

**<sup>11</sup>B NMR of 2-(4-Fluorophenyl)-4,4,5,5-tetramethyl-1,3,2-dioxaborolane (3b)**

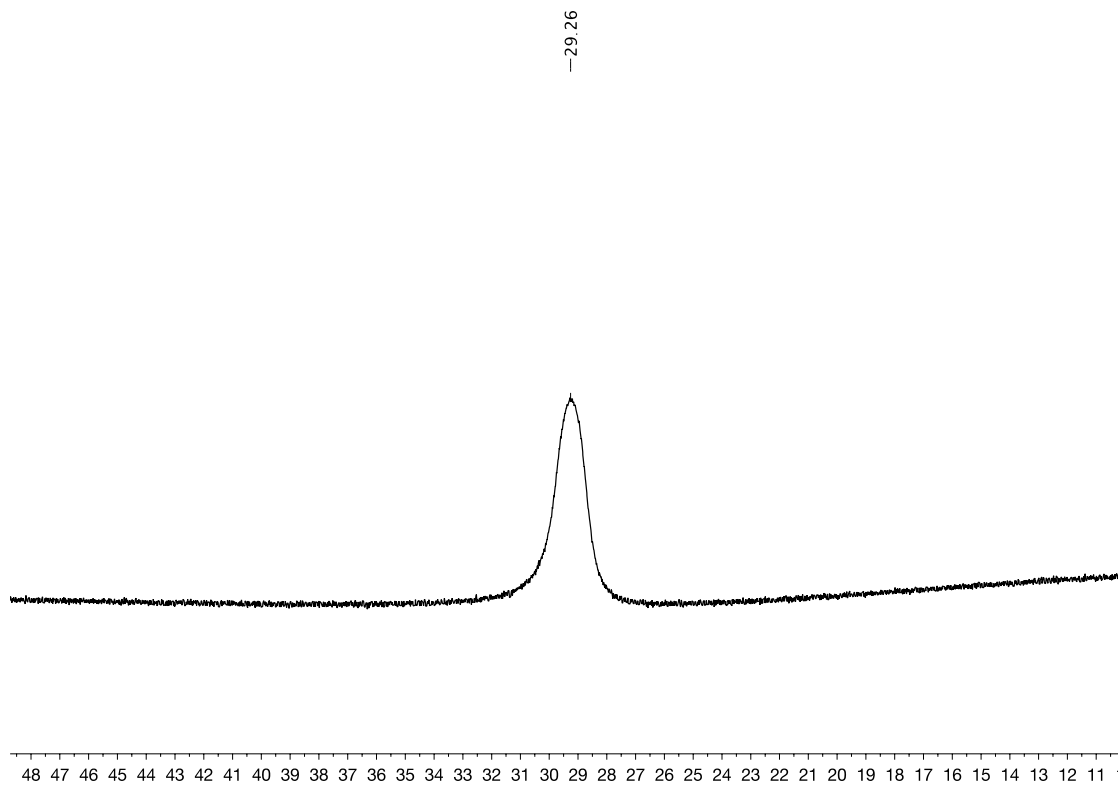

**$^{19}\text{F}$  NMR of 2-(4-Fluorophenyl)-4,4,5,5-tetramethyl-1,3,2-dioxaborolane (3b)**

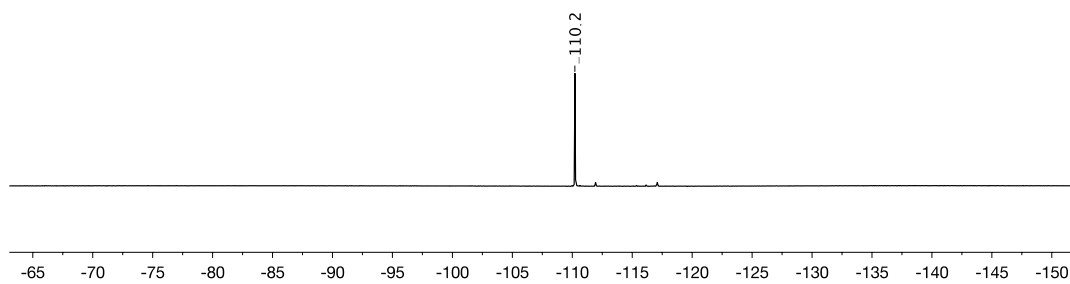

**$^1\text{H}$  NMR of 2-(4-Chlorophenyl)-4,4,5,5-tetramethyl-1,3,2-dioxaborolane (3c)**

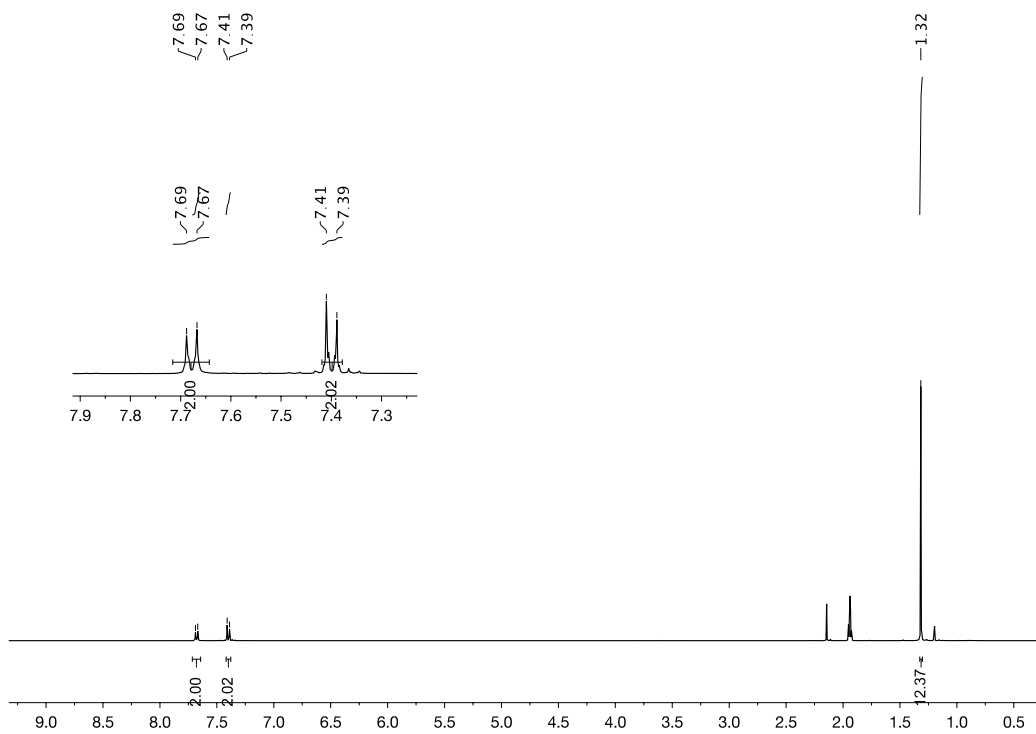

**$^{13}\text{C}$  NMR of 2-(4-Chlorophenyl)-4,4,5,5-tetramethyl-1,3,2-dioxaborolane (3c)**

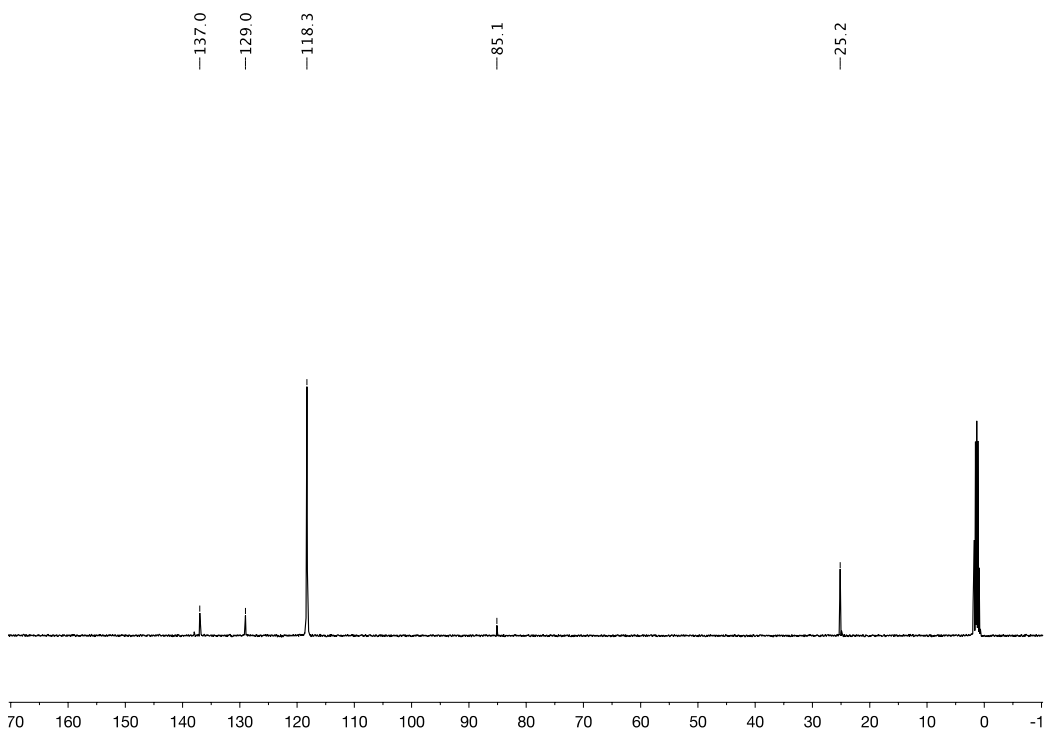

**$^{11}\text{B}$  NMR of 2-(4-Chlorophenyl)-4,4,5,5-tetramethyl-1,3,2-dioxaborolane (3c)**

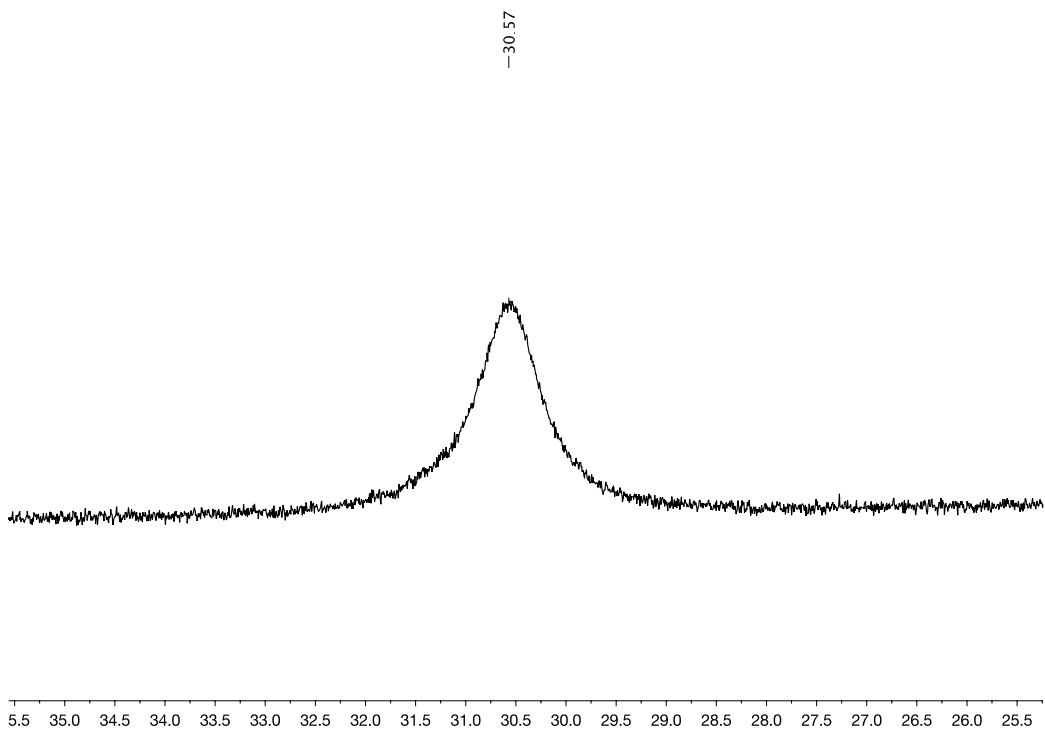

**<sup>1</sup>H NMR of 2-(4-Bromophenyl)-4,4,5,5-tetramethyl-1,3,2-dioxaborolane (3a)**

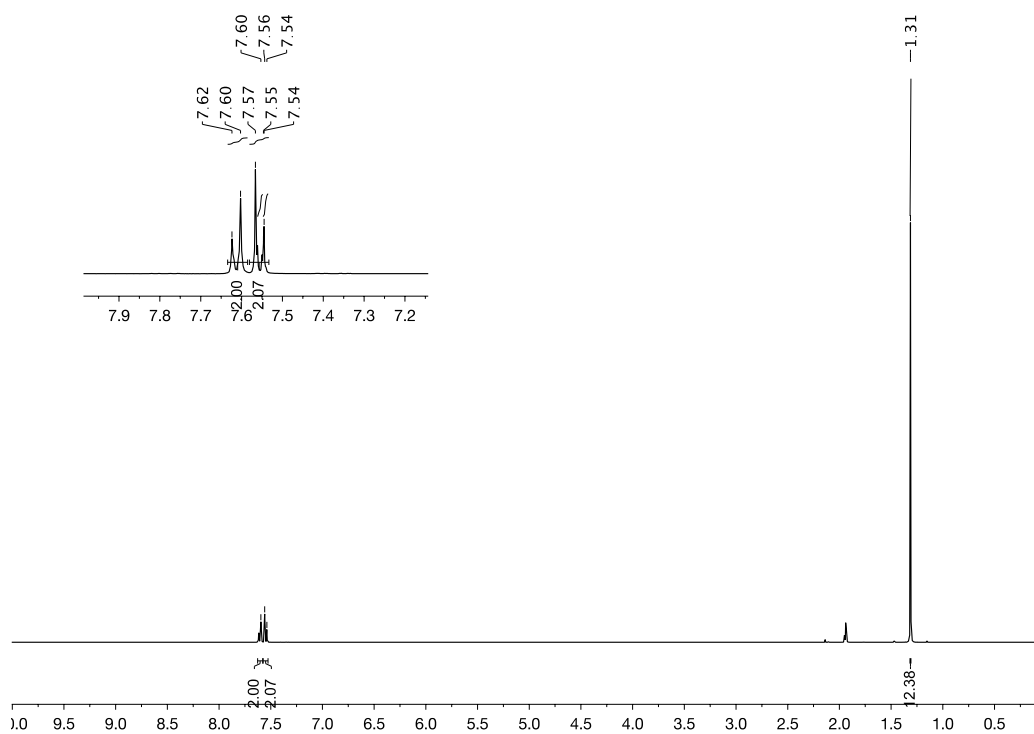

**<sup>13</sup>C NMR of 2-(4-Bromophenyl)-4,4,5,5-tetramethyl-1,3,2-dioxaborolane (3a)**

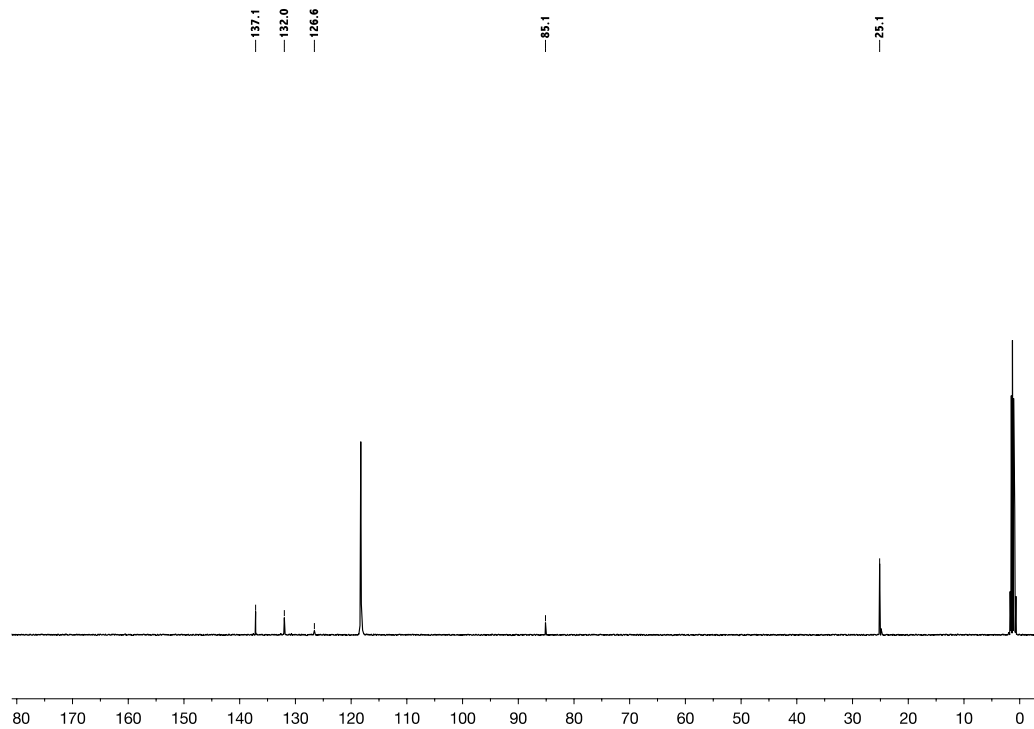

**$^{11}\text{B}$  NMR of 2-(4-Bromophenyl)-4,4,5,5-tetramethyl-1,3,2-dioxaborolane (3a)**

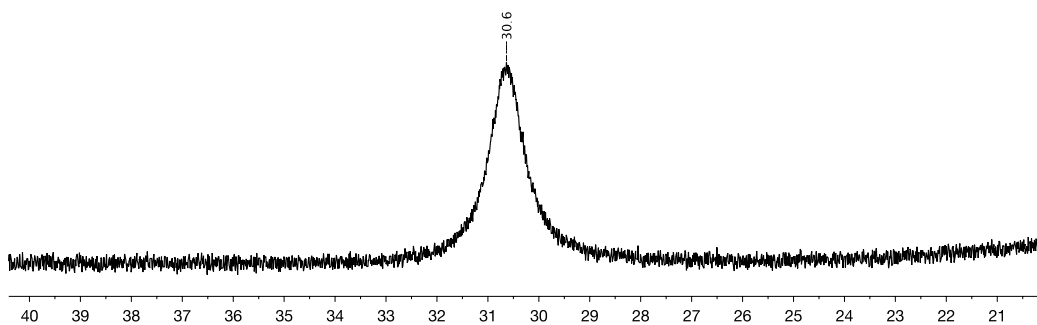

**$^1\text{H}$  NMR of 2-(4-Iodophenyl)-4,4,5,5-tetramethyl-1,3,2-dioxaborolane (3d)**

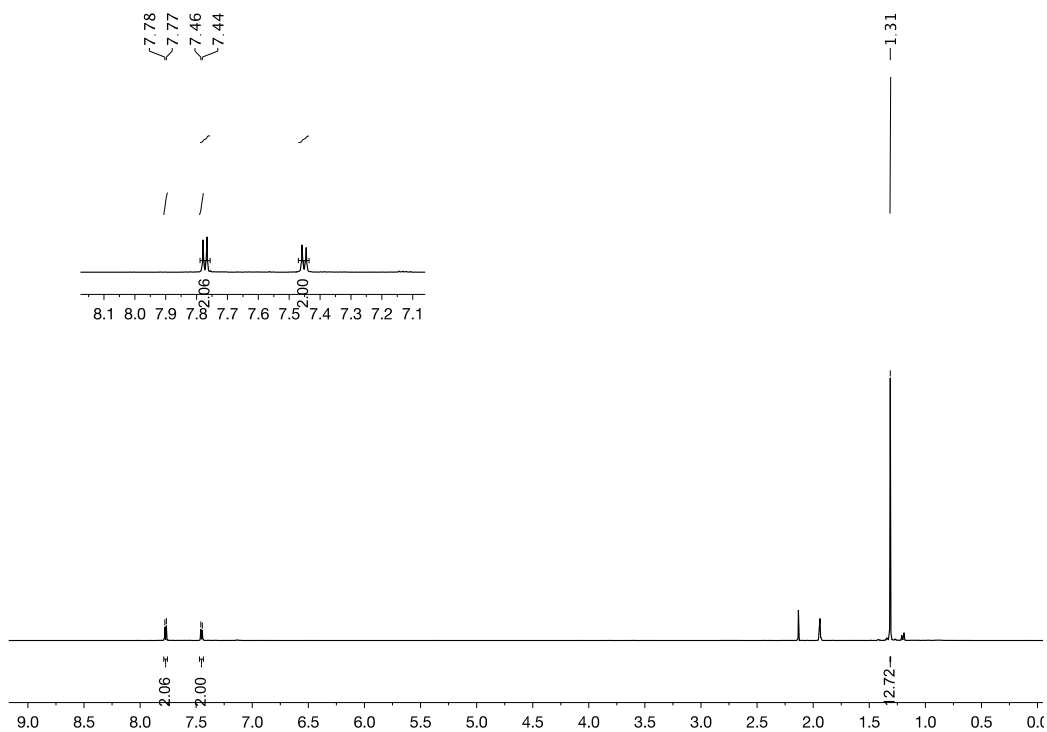

**$^{13}\text{C}$  NMR of 2-(4-Iodophenyl)-4,4,5,5-tetramethyl-1,3,2-dioxaborolane (3d)**

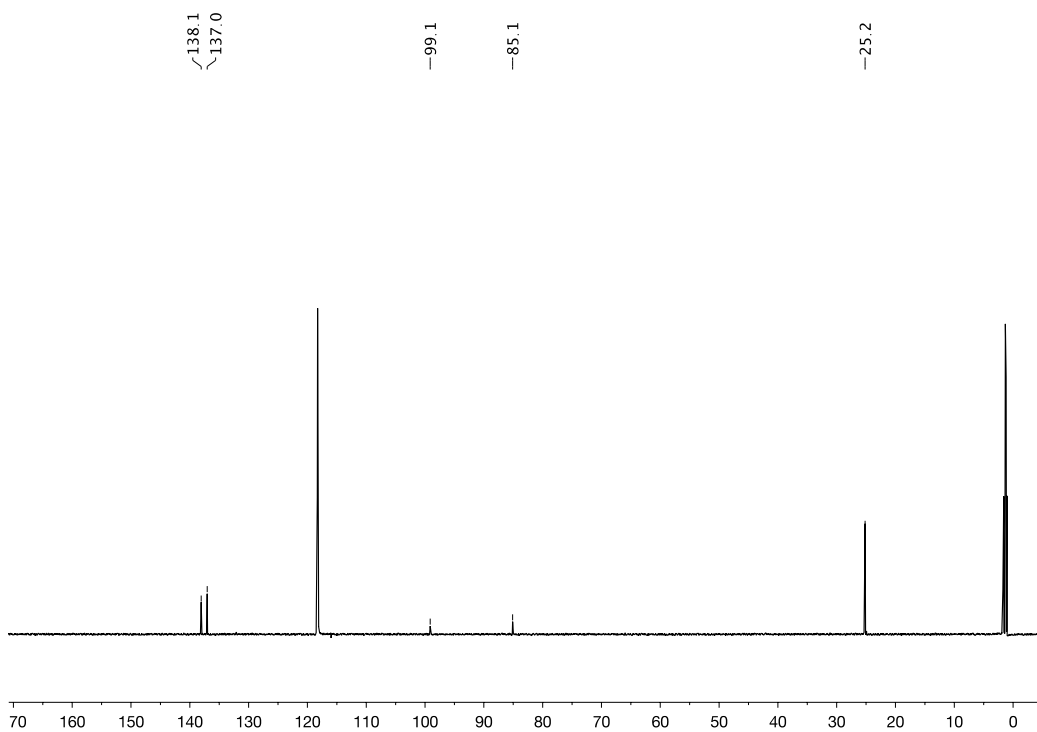

**$^{11}\text{B}$  NMR of 2-(4-Iodophenyl)-4,4,5,5-tetramethyl-1,3,2-dioxaborolane (3d)**

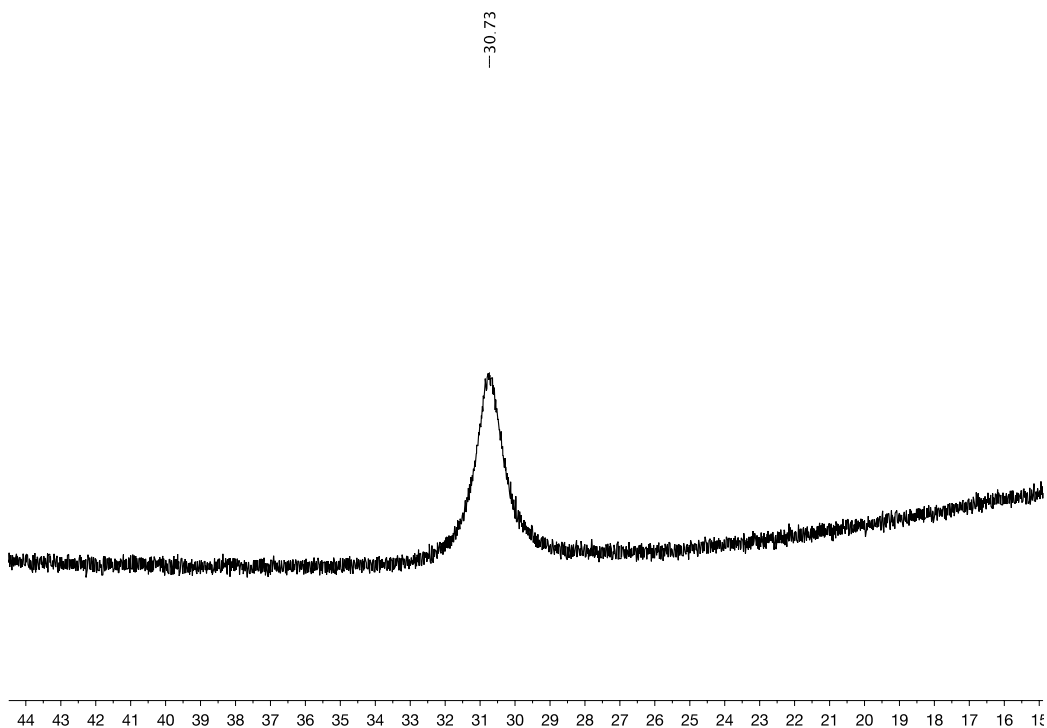

**<sup>1</sup>H NMR of 2-(4-Nitrophenyl)-4,4,5,5-tetramethyl-1,3,2-dioxaborolane (3e)**

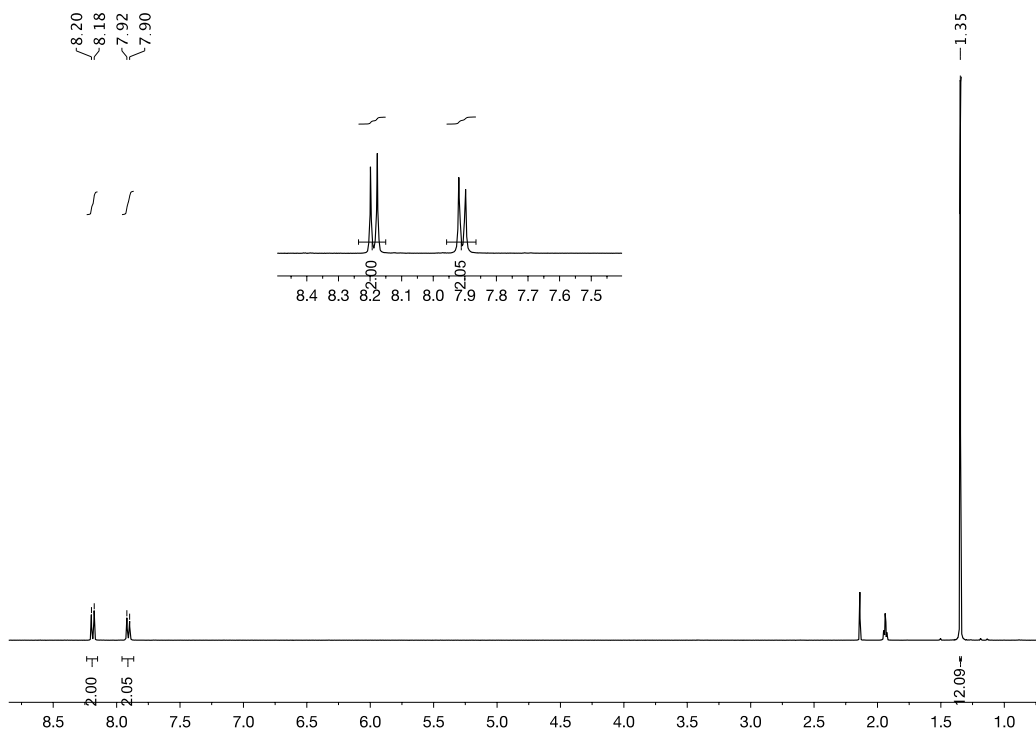

**<sup>13</sup>C NMR of 2-(4-Nitrophenyl)-4,4,5,5-tetramethyl-1,3,2-dioxaborolane (3e)**

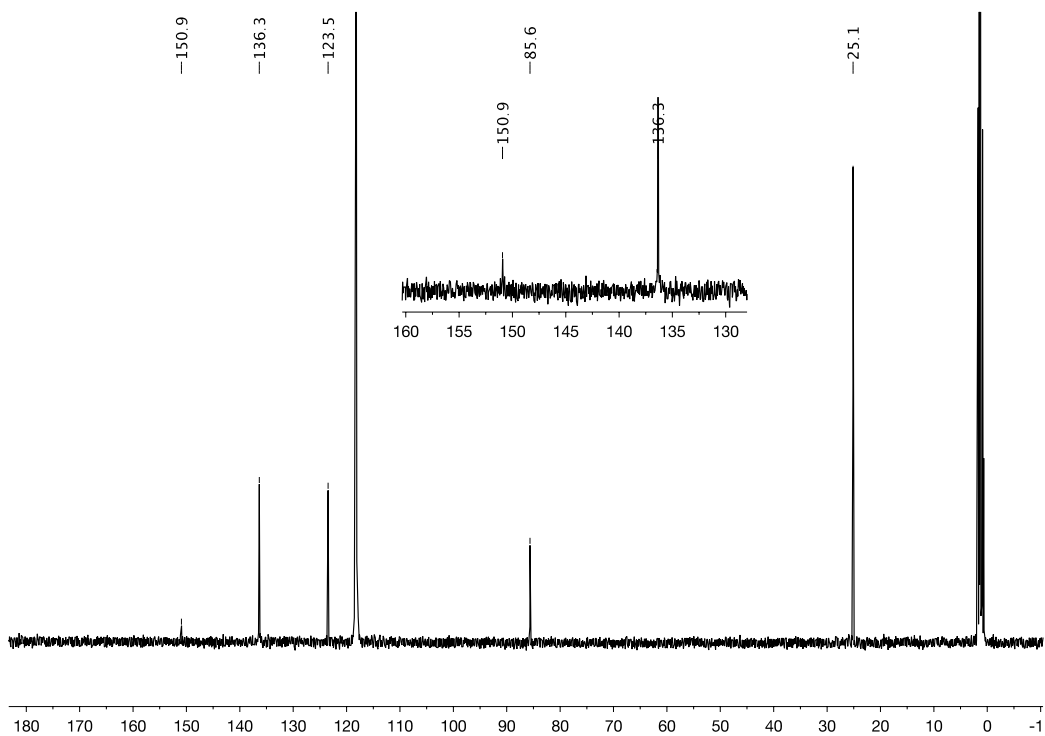

# $^{11}\text{B}$ NMR of 2-(4-Nitrophenyl)-4,4,5,5-tetramethyl-1,3,2-dioxaborolane (3e)

-30.15

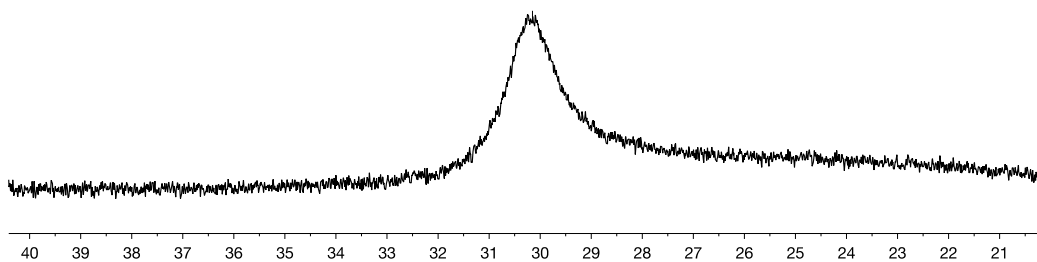

## 8. Differential scanning calorimetry (DSC) of 1a–e

### 4-Fluorophenyldiazonium tetrafluoroborate (1b)

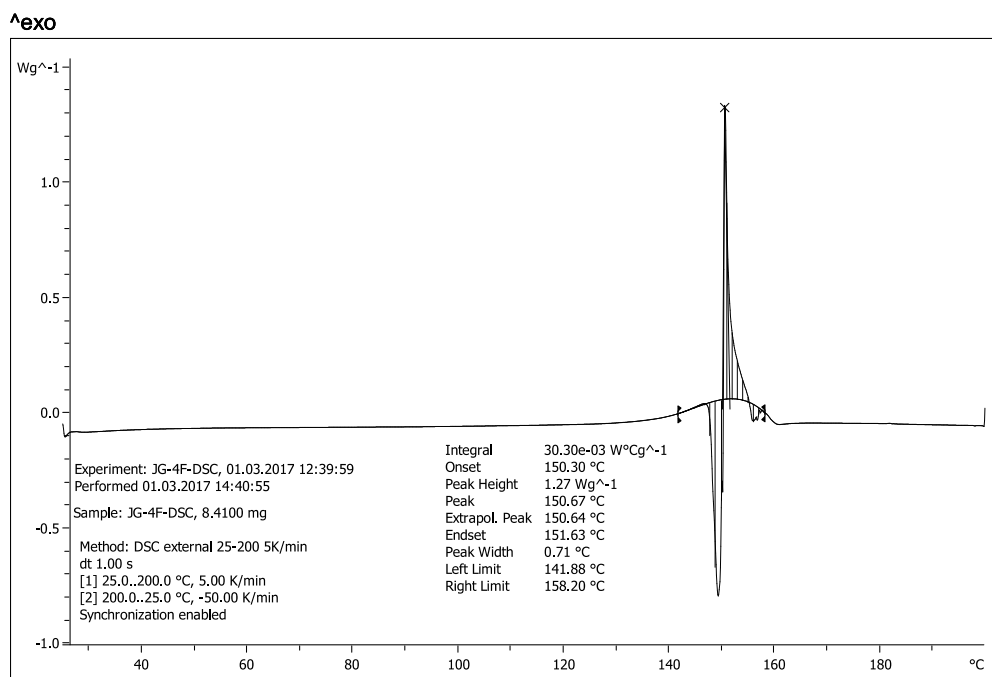

Lab: METTLER

STAR<sup>®</sup> SW 11.00



## 4-Chlorophenyldiazonium tetrafluoroborate (1c)

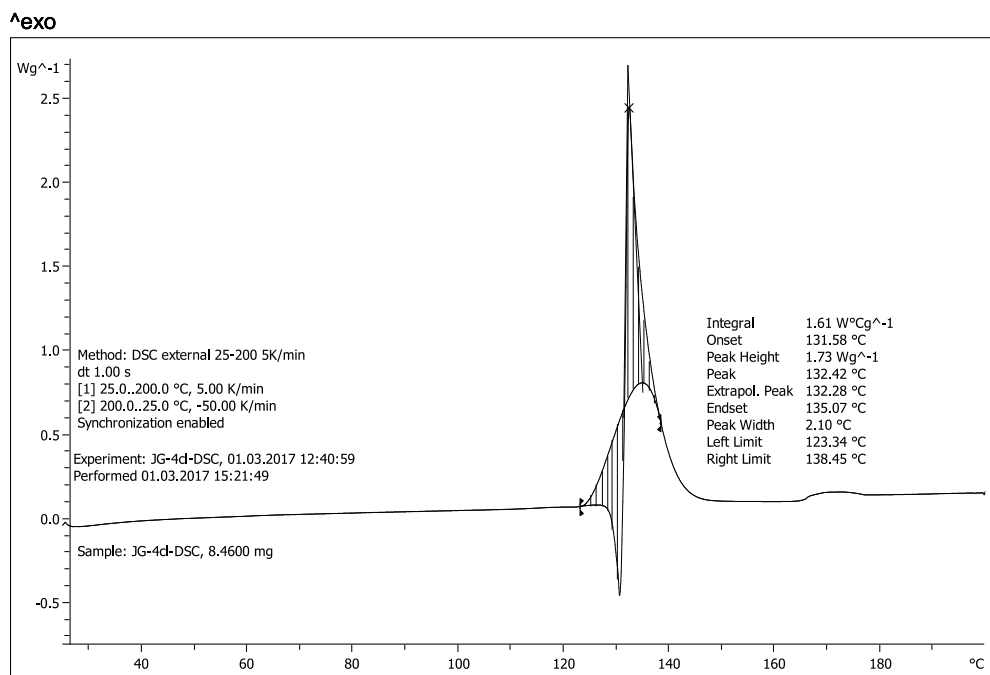

Lab: METTLER

STAR<sup>®</sup> SW 11.00

## 4-Bromophenyldiazonium tetrafluoroborate (1a)

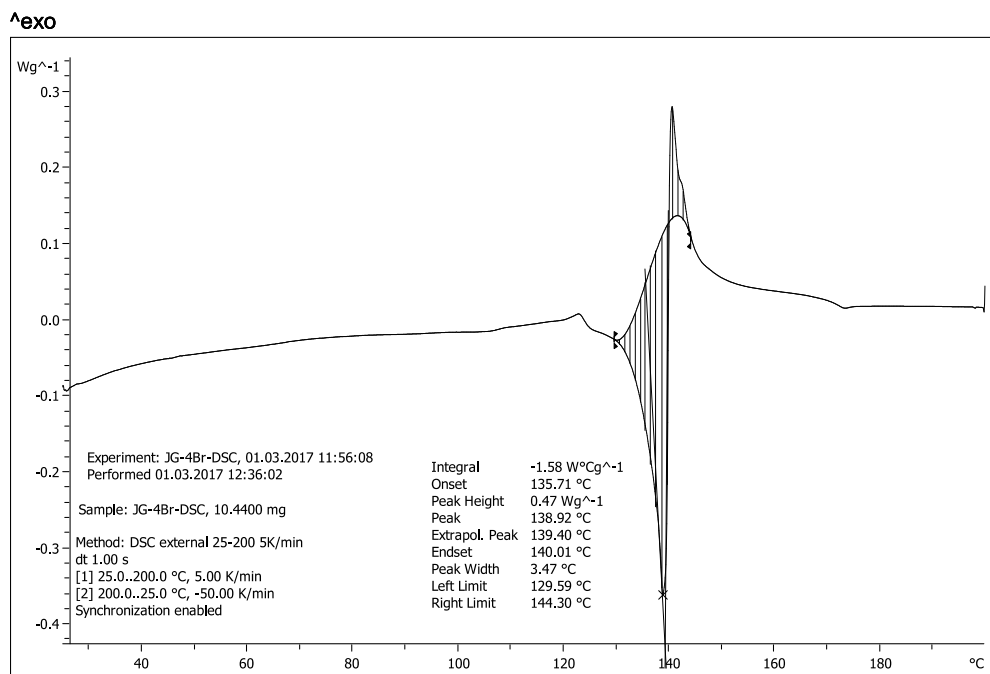

Lab: METTLER

STAR<sup>®</sup> SW 11.00

### 4-Iodophenyldiazonium tetrafluoroborate (1d)

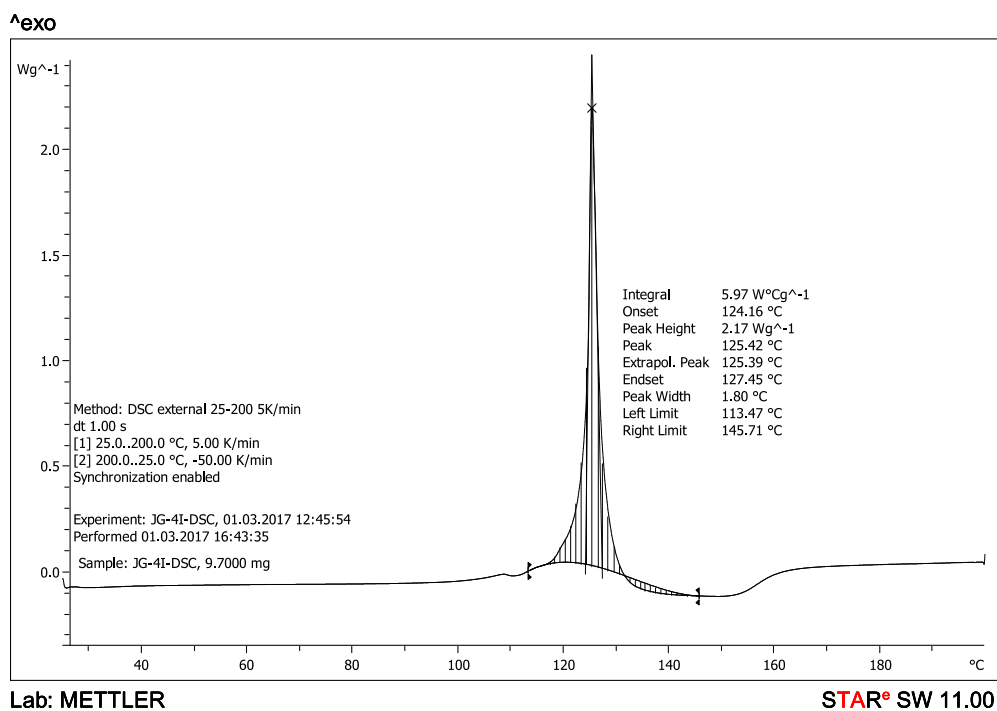

### 4-Nitrophenyldiazonium tetrafluoroborate (1e)

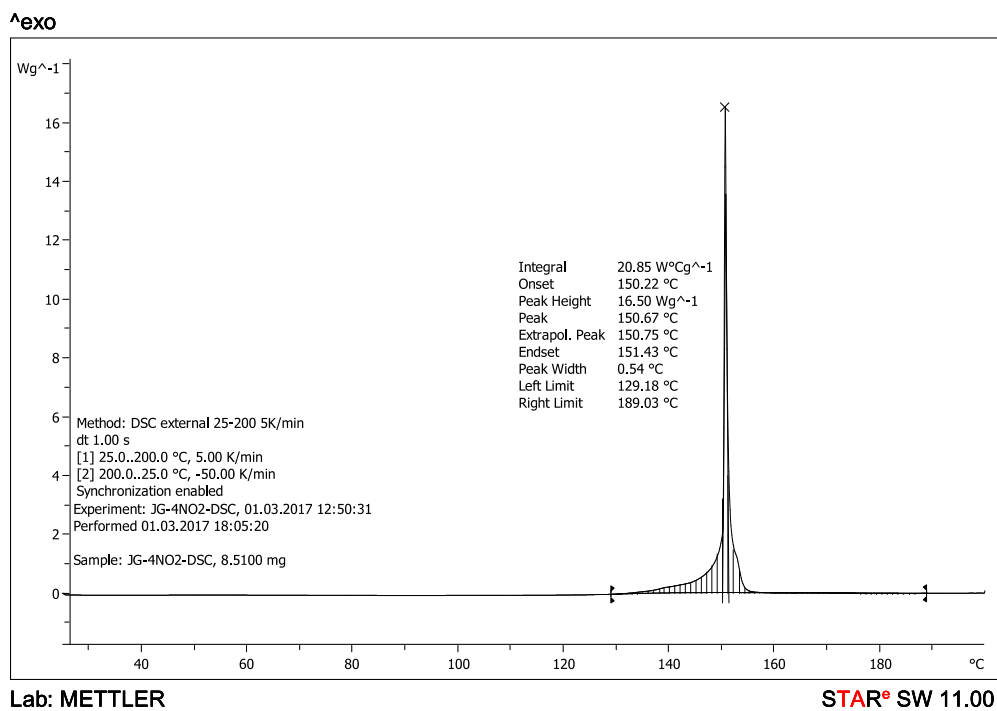

## 9. Thermal decomposition of iodophenyldiazonium tetrafluoroborate (1d)

100 mg of **1d** were weighted in a threaded screw cap glass test tube. The sample was heated in an oil bath for 10 min at 130 °C. Then the sample was cooled down and analyzed by <sup>1</sup>H NMR spectroscopy (see figure below). For a thermal decomposition of aryldiazonium salts observation by ageing, see ref. [5].

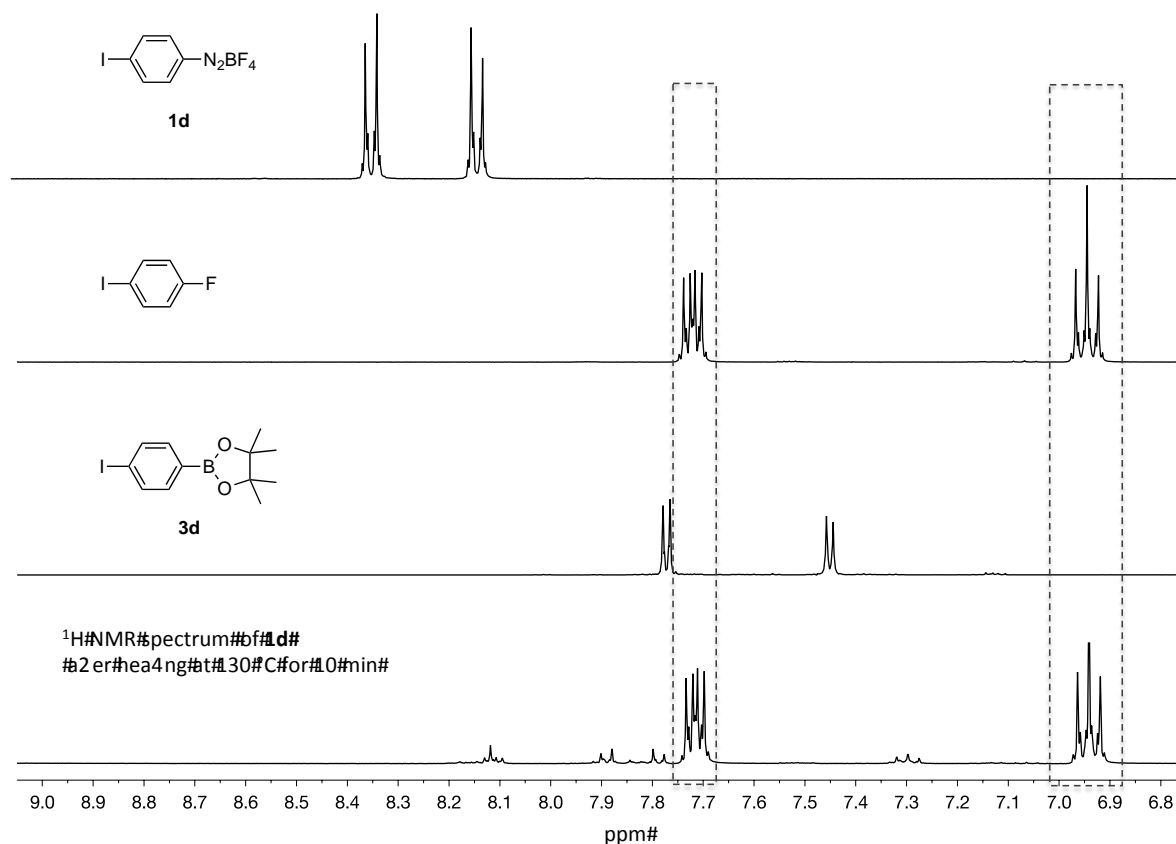

## 10. Borylation of 1a in the presence of 1,1-diphenylethene (4)

A mixture of **1a** (100 mg; 0.369 mmol), **2** (93.7 mg; 0.369 mmol) and **4** (66.4 mg; 0.369 mmol), eosin Y (11.96 mg; 5 mol%) was mixed for 1 h in a 25 mL PMMA milling jar with 15 ZrO<sub>2</sub> balls of 5 mm in diameter at 25 Hz. Irradiation of the reaction mixture was achieved by wrapping the milling jar with a blue-LED strip. After the milling was stopped, the reaction mixture was analyzed by gas chromatography-mass spectrometry.

## Analysis by GC-MS of the reaction mixture of the borylation of 1a in the presence of 1,1-diphenylethene (4).

a) GC trace

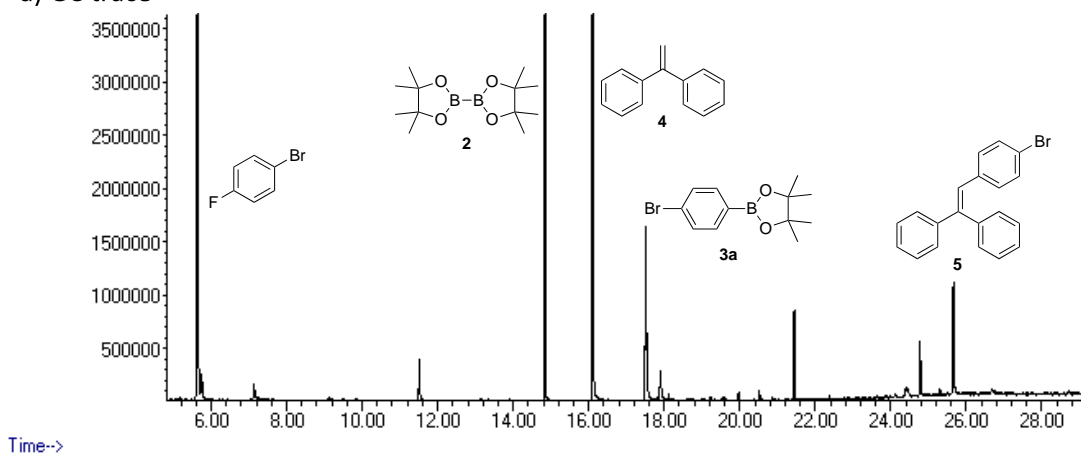

Time-->

b) Mass spectrum of 3a (retention time 17.54 min)

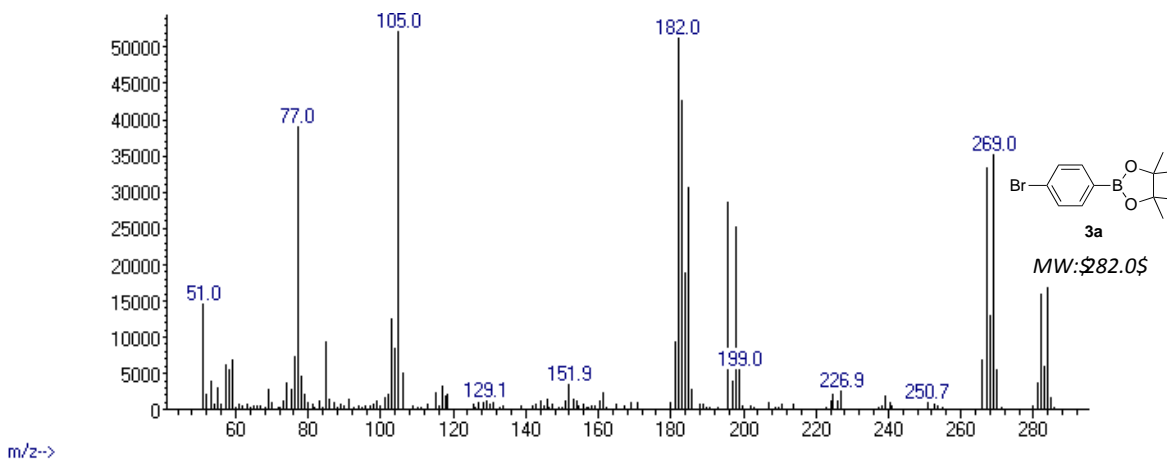

m/z-->

c) Mass spectrum of 5 (retention time 25.66 min)

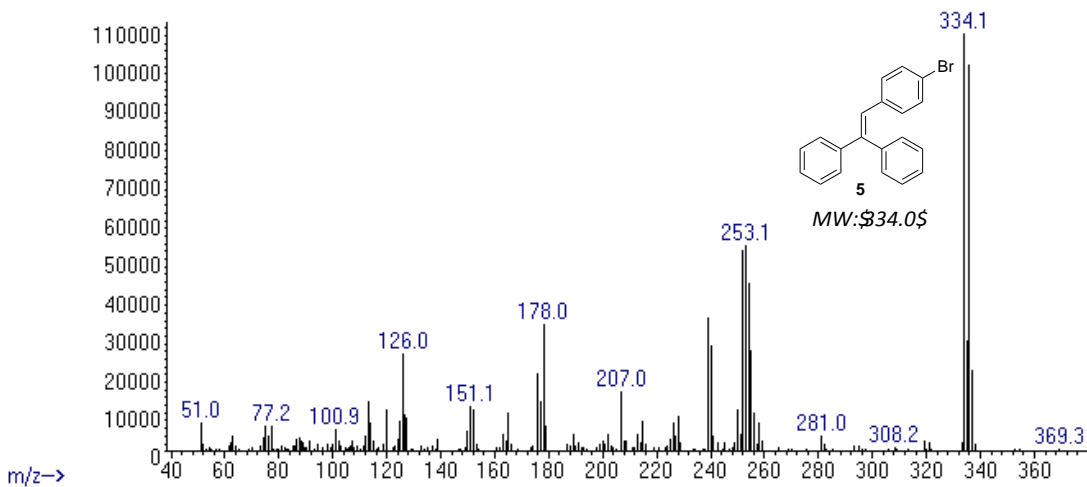

m/z-->

## 11. References

1. Bonin, H.; Delbrayelle, D.; Demonchaux, P.; Gras, E. *Chem. Commun.* **2010**, 46, 2677.
2. Zhang, L.; Jiao, L. *J. Am. Chem. Soc.* **2017**, 139, 607.
3. Xiao, T.; Dong, X.; Tang, Y.; Zhou, L. *Adv. Synth. Catal.* **2012**, 354, 3195.
4. Bose, S. K.; Marder, T. B. *Org. Lett.* **2014**, 14, 4562.
5. Majek, M.; Jacobi von Wangelin, A. *Acc. Chem. Res.* **2016**, 49, 2316.
